## 1                                    **Colonization of a novel host plant reduces phenotypic variation**

2

3    Kalle J Nilsson<sup>1\*</sup>, Masahito Tsuboi<sup>1</sup>, Øystein Opedal<sup>1</sup> and Anna Runemark<sup>1</sup>

4            1. Department of Biology, Lund University, Sölvegatan 37, 223 62 Lund, Sweden

5            \* Corresponding author

6

7    Author contributions: A. R. conceived of and designed the study. K. J. N. and A. R.

8    performed field work and collected the data. K. J. N. eclosed the flies, quantified traits and

9    performed the statistical analysis, with advice of M. T. and Ø. O.. K. J. N. wrote a draft of the

10   manuscript, which all co-authors helped equally on improving. The final version of the

11   manuscript has been commented on and approved by all co-authors.

12

13   Acknowledgements: We thank Mikkel Brydegaard for his assistance in programming the

14   melanisation trait measurements, Jesús Ortega, Jodie Lilley, Emma Kärrnäs, and Mathilde

15   Schnuriger for help in the field and in the lab. This study was funded by a Wenner-Gren

16   Fellowship, a Crafoord grant and a Swedish Research Council grant to A. R..

17

18   Conflict of interest: No conflicts of interest.

19

20   Data availability: All data and code used in this study will be published online upon

21   acceptance.

22

23 **Abstract**

24 Understanding the evolutionary potential of populations –evolvability– is key to predicting  
25 their ability to cope with novel environments. Despite growing evidence that evolvability  
26 determines the tempo and mode of adaptation, it remains unclear how adaptations to novel  
27 environments influence evolvability in turn. Here we address the interplay between  
28 adaptation and evolvability in the peacock fly *Tephritis conura*, which recently underwent an  
29 adaptive change in the length of female ovipositor following a host shift. By comparing  
30 evolvability in various morphological traits including female ovipositor length between  
31 ancestral and derived host races, we found that evolvability is decreased in females of the  
32 derived host race compared to the ancestral host race. We found a correlation between  
33 evolvability and divergence between populations in both sexes, indicating that the overall  
34 pattern of evolvability has not been disrupted by the host shift despite the reduction in  
35 females of the derived host race. Exploration of the pattern of phenotypic integration further  
36 revealed that the ovipositor length constitutes a module that is separated from other measured  
37 traits. These results suggest that adaptation to novel environments can affect evolvability, and  
38 that modularity helps minimizing detrimental effects that adaptations may cause to other  
39 correlated traits.

40

41 Key words: Evolutionary potential, evolvability, host race formation, diversification,  
42 selection, lines of least resistance

## 43 **Introduction**

44 Variation is the raw material for adaptive evolution. Natural selection results from variation  
45 in genotypes, phenotypes and fitness, and the evolutionary potential for response to selection  
46 is determined by standing genetic variation. There is mounting evidence that a lack of  
47 evolutionary potential may constitute evolutionary constraint to adaptive divergence  
48 (Bradshaw and McNeilly 1991; Schluter 2000; Arnold et al. 2001; Bolstad et al. 2014; Houle  
49 et al. 2017; McGlothlin et al. 2018), and that evolutionary potential is highly variable across  
50 traits and species (Hansen and Pelabon 2021). A key question is therefore how evolutionary  
51 potential evolves, and how this interacts with patterns of adaptation during the process of  
52 evolutionary divergence (Berner et al. 2010; Eroukhmanoff and Svensson 2011).

53 Quantitative genetics provides a powerful approach to quantifying the evolutionary  
54 potential of a species. Phenotypic variation plays a prominent role in the theoretical  
55 framework of evolutionary quantitative genetics, as summarized by the simple ‘Lande  
56 equation’ (Lande 1979). This framework emphasizes the role of the additive genetic  
57 variance-covariance matrix (**G**) as a key determinant of response to selection, i.e.  
58 evolutionary potential. If the **G**-matrix remains relatively stable over time, adaptive evolution  
59 could be well understood through focusing on the dynamics of selection. However, if **G** itself  
60 evolves (Jones et al. 2003; Arnold et al. 2008; Milocco and Salazar-Ciudad 2022) and  
61 changes over time, the predictive power associated with a contemporary estimate of **G** is  
62 critically dependent on our understanding of the dynamics of **G** (Walsh and Blows 2009;  
63 McGlothlin et al. 2018).

64 Previous work suggests that **G** does evolve in natural populations (Cano et al. 2004;  
65 Doroszuk et al. 2008; Björklund et al. 2013; Walter et al. 2018), but how **G** evolves is less  
66 well understood. This is partly due to the difficulty in formulating testable hypotheses  
67 regarding the evolution of **G** (Pélabon et al. 2010). For example, the structure of variance-

68 covariance matrices may be altered following selection (Revell et al. 2010; Penna et al. 2017)  
69 and ancestral bottlenecks are expected to affect current evolvability by reducing genetic  
70 variation (Nei et al. 1975). However, a bottleneck may also increase genetic variance if there  
71 is cryptic genetic variance under effects of epistasis, dominance or the environment  
72 (Whitlock et al. 2002; Paaby and Rockman 2014). Gene flow among diverging lineages can  
73 also increase evolvability if mixed genetic variants result in phenotypic variation that is  
74 relevant for selection (Guillaume and Whitlock 2007).

75         The examples above illustrate the complexity of deriving general predictions based  
76 solely on first principles. To narrow down the parameter space, empirical studies are needed  
77 that compare variational properties of diverging populations with known histories of  
78 selection. Host shifts provide an excellent opportunity in this regard because we know *a*  
79 *priori* that ancestral and derived populations are evolving towards different phenotypic  
80 optima (Assis et al. 2016). Here, we take advantage of a recent host shift in the peacock fly  
81 *Tephritis conura* (Diegisser et al. 2006a; Diegisser et al. 2006b, 2007; Diegisser et al. 2008;  
82 Nilsson et al. 2022; Ortega et al. [*in prep.*]) to study evolution of variation during population  
83 divergence.

84         Adult *T. conura* tephritid flies oviposit into the buds of *Cirsium* thistle buds, and larva  
85 and pupae develop within the buds. The ancestral host plant is *Cirsium heterophyllum*, but a  
86 subset of populations has recently undergone a host shift from *C. heterophyllum* to *C.*  
87 *oleraceum* (Romstock-Volkl 1997). Interestingly, there is evidence of phenotypic adaptation  
88 to the specific host plants, most clearly in the length of the ovipositors. Flies infesting *C.*  
89 *oleraceum* have shorter ovipositors than flies infesting *C. heterophyllum* (Diegisser et al.  
90 2007; Nilsson et al. 2022), matching the smaller bud size of the plant (Romstock-Volkl  
91 1997). Moreover, there is empirical evidence for strongly reduced survival on the alternative  
92 host plant (Diegisser et al. 2008), suggesting strong host plant-mediated selection.

93 The documented natural history of our *T. conura* populations allows us to empirically  
94 examine the evolution of variation over the course of population divergence. We approach  
95 this question from three perspectives. First, for traits that differ between the ancestral and  
96 derived host race, we expect historical and potentially current directional selection in the  
97 derived host race. Specifically, selection on the ovipositor to match the bud size of the  
98 derived host plant (Romstock-Volkl 1997) likely caused directional selection in the derived  
99 host race which has a shorter ovipositor length compared to the ancestral host race (Diegisser  
100 et al. 2007; Nilsson et al. 2022). This selection may have altered the structure of the  
101 phenotypic variance covariance matrix (**P**) in the derived host race in *T. conura*. Using the  
102 concept of conditional variance and autonomy that quantifies the degree of independence  
103 among correlated traits (Hansen et al. 2003), we evaluate how the hypothesized directional  
104 selection on the ovipositor in the derived host race of *T. conura* affects the overall structure  
105 of the P-matrix.

106         Second, we explore if the evolvability in populations that exist in sympatry with the  
107 alternative host race is higher than in allopatric populations due to gene flow between the  
108 host races. Secondary sympatry between two recently diverged conspecifics has been  
109 suggested to impact the phenotypic covariance as gene flow could increase the combinations  
110 of traits available to selection (Blows and Higgie 2003; Dochtermann and Matocq 2016).  
111 Host races specializing on the two different host plants coexist geographically in a broad  
112 zone where the southern *C. oleraceum* and the northern, ancestral, *C. heterophyllum* are both  
113 common (Fig. 1A). This enables us to test to which extent coexistence with the other host  
114 race affects **P**.

115         Finally, we evaluate whether patterns of divergence are themselves correlated with  
116 the structure of the ancestral P-matrix, thus testing the hypothesis that ancestral variation can  
117 constitute genetic constraints (Bolstad et al. 2014; Houle et al. 2017; McGlothlin et al. 2018).

118 We assess this by asking whether patterns of host-race divergence align with variation within  
119 the ancestral host race, so that the host races are diverging in a direction of greater-than-  
120 average ancestral variation (Schluter 1996).

121

## 122 **Methods:**

### 123 **Sampling**

124 To examine the distribution of phenotypic variation within and among fly populations  
125 specialized on the derived and ancestral host plant we sampled flies from four populations of  
126 each host race (Fig. 1A). A haplotype analysis suggests that the host shift took place during  
127 the last ice age (~18 thousand years ago) in the Alps (Diegisser et al. 2006b). While  
128 alternative host races are largely reproductively isolated due to differences in the location at  
129 which copulation takes place and differences in phenology (Romstock-Volkl 1997), there is  
130 evidence of gene flow between the two host races (Diegisser et al. 2006b; Ortega et al. [*in*  
131 *prep.*]). To allow assessing a potential effect of gene flow on evolvability, we included  
132 allopatric populations as well as populations that were regionally sympatric with the other  
133 host race. We collected thistle buds infested by *T. conura* during the pupal stage at all these  
134 locations (Fig. S1) and allowed adults to eclose in a common laboratory environment as  
135 described in Nilsson et al. (2022). The sampling scheme enables us to examine to what extent  
136 patterns of phenotypic variance are explained by host plant adaptations and by regional  
137 sympatry with the other host race. We use the terms sympatric and allopatric to refer to the  
138 presence of one or both thistle species on a regional scale (Fig. 1A).

139

### 140 **Measures of morphology and wing shape**

141 After collecting *T. conura* adults, one female and one male per bud was euthanized by  
142 freezing individuals for a few days after eclosion, and subsequently included in the

143 morphological analysis. We chose ovipositor length, several size measurements, wing  
144 melanisation, and a large set of wing shape measurements as study traits. The ovipositor  
145 length is a key functional trait, and we thus consider it separately from the size and shape  
146 measurements. Previous work with fly wings of Drosophilid flies has found a high level of  
147 integration among wing measurements (Klingenberg and Zaklan 2000). Assuming a similarly  
148 high level of integration in wing morphological traits in *T. conura*, including wing shape  
149 would allow us to compare sets of traits that differ in the degree of integration (Bolstad et al.  
150 2014). Wings are also potentially under sexual selection in Tephritid flies, as they are used in  
151 male displays (Sivinski and Pereira 2005). To quantify wing shape in *T. conura* we used a  
152 Celestron 44308 USB microscope to take magnified images. We took one lateral image of the  
153 fly body after removal of the wings and one dorsal image of the right wing on a transparent  
154 background to allow better visibility of the wing veins. We measured body length, ovipositor  
155 length (Fig. 1D), wing length, wing width and wing area digitally from these images. Those  
156 variables were measured in units of pixels, which were then converted to units of mm using a  
157 scale that was photographed with each image. We also placed 15 landmarks, adapted from  
158 Pieterse et al. (2017; Fig. 1E) for geometric morphometrics using TPSDig2 v2.31 and  
159 TPSUtil v1.76 (Rohlf 2015). This resulted in six wing shape traits (represented by the first six  
160 principal components of x-y coordinates) for 285 female flies and 288 male flies (see Table  
161 S1 for full population sample sizes). A Procrustes fit was applied to the landmark data using  
162 PAST3 v3.20 (Hammer et al. 2001). To produce variables to include in later analyses we  
163 took the first six principal components which explained 68% of the total phenotypic  
164 variation. The melanised area of the wing was measured through an automated script  
165 developed in MATLAB (Matlab 2017) as in Nilsson et al. (2022). All subsequent statistical  
166 analyses were performed in R version 3.6.1 (R Core Team 2019).

167

## 168 **Measures of evolvability**

169 Evolutionary potential – evolvability – can be measured as a mean-scaled additive genetic  
170 variance (Houle 1992). For multivariate phenotypes, evolvability measures are typically  
171 derived from mean-scaled additive genetic variance matrices (**G**) (Hansen and Houle 2008)  
172 obtained from quantitative-genetic breeding experiments. Phenotypic variance matrices (**P**) is  
173 the sum of **G** and the environmental effects shaping trait variation in the population (Steppan  
174 et al. 2002), and is sometimes used as a proxy for **G**. Although this approach has been  
175 debated (Willis et al. 1991), there is both theoretical (Cheverud 1988) and empirical (Kohn  
176 and Atchley 1988; Roff and Mousseau 2005; Porto et al. 2009; Sodini et al. 2018) evidence  
177 that **P** can be a reasonable surrogate of **G**, particularly for morphological traits (Hadfield et  
178 al. 2007). In addition, because **P** is far easier to obtain than **G**, **P** can be evaluated from  
179 multiple populations in their natural habitats. This allows us to study how variational  
180 properties (e.g. genetic or phenotypic variances and covariances) are related to ecology and  
181 evolve during evolutionary divergence (Berner et al. 2010; Grabowski et al. 2011; Hansen  
182 and Voje 2011; Haber 2016; Tsuboi et al. 2018). In the following analyses of P-matrices we  
183 will refer to patterns of variation as ‘evolvability’, but note that this rests on the assumption  
184 of strongly correlated environmental and genetic variation (Hansen et al. 2011).

185

## 186 **Estimating P-matrices**

187 We estimated P-matrices by fitting multivariate mixed models with the `MCMCglmm` R  
188 package (Hadfield 2010) and subsequently postprocessed the posterior distributions with  
189 tools from the `evolvability` R package (Bolstad et al. 2014). For each model, we  
190 sampled the posterior distributions for 1 million MCMC iterations, with a burn-in of 500000  
191 and a thinning interval of 500. We assumed uninformative priors for the fixed effects, and the  
192 recommended weakly informative priors for the random effect (Hadfield 2010).



193 All analyses were performed separately for females and males to enable us to include  
194 the functionally important ovipositor for females. To test if there are differences in  
195 evolvability between the host races, we started by estimating mean P-matrices for each host  
196 race in models including population as a random factor. To address if interpopulation  
197 variance differed between host races we fit similar models per population, but without a  
198 random factor. To disentangle if phenotypic variance differed between size, melanisation and  
199 shape traits, we repeated the analysis for three different data sets, one with all traits, one with  
200 size and melanisation traits and finally one with only wing shape traits.

201 To assess the distribution of variation within and among populations, we fitted  
202 separate linear mixed-effect models to log-transformed trait values, with population as a  
203 random effect. We then computed the among-population variance component as the variance  
204 among populations divided by the sum of the among-population and residual (within-  
205 population) variance.

206

### 207 **Comparisons of evolvability and P-matrices**

208 To test for differences in mean evolvability between host races we first derived posterior  
209 means and credible intervals of evolvability from each estimated P-matrix, and then  
210 calculated posterior support for host plant differences in evolvability as the proportion of  
211 randomly paired posterior estimates for which evolvability was greater for the more  
212 evolvable host race than for the less evolvable host race.

213 To investigate if phenotypic variance differed between flies that coexist with the other  
214 host race, likely subject to some introgression (Ortega et al. [*in prep*]), and allopatric flies we  
215 performed similar comparisons of posterior means.

216 To assess similarity between the P-matrices estimated for the ancestral and derived  
217 host races, we correlated the expected responses to a set of random hypothetical selection

218 gradients for the two P-matrices (Hansen & Houle 2008). This approach compares the P-  
219 matrices in terms of the parameters they are used to derive within the present theoretical  
220 framework (i.e. response to selection). We generated 1000 random selection gradients drawn  
221 from the unit sphere, and used the `evolabilityBeta` function of the `evolabilityR`  
222 package (Bolstad et al. 2014) to compute the evolvability along each selection gradient for  
223 each matrix.

224

### 225 **The effect of ancestral evolvability on divergence**

226 Our sampling of both the ancestral and derived host race also allowed us to ask whether the  
227 derived host race has diverged in a direction of comparatively high evolvability, as expected  
228 if genetic constraints play a role in host race divergence. We asked this question in two  
229 different ways. First, we estimated a variance-covariance matrix among log-transformed  
230 population means (divergence matrix, **D**), and assessed the relationship between **D** and **P**  
231 **estimated for** the ancestral host race. Second, we considered the divergence of each  
232 population of the derived host race from the mean phenotype of the ancestral host race. We  
233 computed divergence vectors  $\Delta\bar{\mathbf{x}}_{log}$  from a focal population to the mean of the ancestral host  
234 race as  $\Delta\bar{\mathbf{x}}_{log} = \log(\bar{\mathbf{x}}_1) - \log(\bar{\mathbf{x}}_A)$ , where  $\bar{\mathbf{x}}_A$  is the vector of mean phenotypes for the  
235 ancestral host race. We then computed the evolvability along  $\Delta\bar{\mathbf{x}}_{log}$  as  $e(\Delta\bar{\mathbf{x}}_{log}) =$   
236  $\Delta\bar{\mathbf{x}}_{log}^T \mathbf{P} \Delta\bar{\mathbf{x}}_{log}$ , and compared this to the mean and maximum evolvability of the focal P-  
237 matrix. Divergence in a direction of greater-than-average evolvability would be consistent  
238 with some influence of ancestral variance on divergence.

239

### 240 **The effect of the ovipositor on evolvability and divergence**

241 Patterns of trait divergence allowed us to formulate hypotheses about past or current patterns  
242 of selection on different traits. The ovipositor is shorter in the derived host race (Diegisser et

243 al. 2007; Nilsson et al. 2022), and is thus likely either to be or to have been under directional  
244 selection to match the bud size of the derived host plant. The directional selection on  
245 ovipositor length in the derived host race may have depleted the variation in ovipositor  
246 length, and of the available combinations of ovipositor length and other traits within the fly  
247 populations. By comparing the autonomy, i.e. the freedom of a trait to evolve independently  
248 of other traits (Hansen and Houle 2008), of ovipositor length between the ancestral host race  
249 and the derived host race, we examined if there was evidence for a decreased autonomy in the  
250 derived host race. If the derived host race has a lower autonomy of ovipositor length than the  
251 ancestral host race, it may be an effect of reduced available variation. We further assessed if  
252 the autonomy of the ovipositor differed from the autonomies of other traits by separating  
253 overall evolvability, evolvability conditioned on all but a focal trait (hereafter referred to as  
254 overall conditional evolvability), and evolvability conditioned on ovipositor length. Overall  
255 evolvability and conditional evolvability was calculated as described elsewhere (Hansen and  
256 Houle 2008; Bolstad et al. 2014), while evolvability conditioned on ovipositor length was  
257 extracted from a separate P-matrix where we conditioned the entire matrix on ovipositor  
258 length by using the `evolvabilityBeta` function of the R-package `evolvability` (Bolstad et  
259 al. 2014). We also compared the autonomy of all individual traits conditioned on ovipositor  
260 length to the autonomy of the same traits conditioned to any non-ovipositor trait.

261 To assess whether the ovipositor plays a particular role in driving patterns of  
262 divergence, we reran the divergence-vector analyses described above using three different  
263 measures of evolvability, namely (1) raw evolvability, (2) conditional evolvability, and (3)  
264 evolvability conditioned only on ovipositor length. A clearer relationship for the latter would  
265 indicate that the ovipositor plays a specific role in driving population divergence.

266

267 **Results**

268 Differences among populations explained an average of 14.2% of trait variance in the  
269 ancestral host race, and an average of 33.2% in the derived host race. The among-population  
270 variance component ranged across traits from 2.6% to 21.9% in the ancestral host race, and  
271 from 0.06% to 72.1% in the derived host race (Fig. 2). Some wing shape traits had too little  
272 variance to estimate variance among populations, specifically principal component 3 and 6 in  
273 the ancestral host race, and both within- and among-population variance in principal  
274 component 6 in the derived host race.

275

### 276 **Comparisons of evolvability and P-matrices**

277 The derived host race exhibited slightly reduced evolvability compared to the ancestral host  
278 race (Fig. 3A-B). Females of the ancestral host race had a slightly broader distribution along  
279 the axis of largest variation compared to the derived host race, but the distribution along the  
280 second axis of variation was very similar for females of the two host races (Fig. 3A). In  
281 comparison, male variance differed very little between host races (Fig. 3B).

282

283 Wing shape traits were two orders of magnitude less variable than size and melanisation  
284 traits. We found small but detectable differences in evolvability between females of the two  
285 host races. Including all traits, the evolvability of females of the derived host race was 20.7%  
286 lower than that of females of the ancestral host race (posterior mean difference with SE:  
287  $1.23 \times 10^{-4} \pm 1.99 \times 10^{-6}$ ; Fig. 3). In comparisons including size and melanisation traits only,  
288 this difference increased to 21.9% ( $2.48 \times 10^{-4} \pm 3.91 \times 10^{-6}$ ). The evolvability of wing shape  
289 traits was, however, not detectably different between the host races as the decrease in  
290 evolvability in the derived host race is only 0.024% (Fig 3; Table S2).

291 The male p-matrices were more similar between the host races than were the female  
292 P-matrices (Fig. 3B). In turn, we failed to detect a difference in evolvability between males of

293 the two host races for either of the trait subsets, although the evolvability was 11% lower in  
294 the derived host race compared to the ancestral host race in a comparison including both size,  
295 melanisation and wing shape traits (Fig. 3D; Table S2).

296 We found no support for the idea that gene flow increases evolvability, as indicated  
297 by no detectable differences in mean evolvability between allopatric and sympatric flies of  
298 either sex (Fig. 3C, 3D). Contrary to our prediction we found a 10.3% increase in evolvability  
299 in allopatric compared to sympatric populations in females when comparing all traits (Fig.  
300 3C; Table S2), and a similar increase when including only size and melanisation traits (Fig.  
301 3E; Table S2) whereas wing shape traits had very similar levels of evolvability in allopatric  
302 and sympatric populations (Fig. 3F; Table S2). The patterns in males mirrored those found in  
303 females (Fig. 3D; Table S2).

304 The ancestral and derived  $\mathbf{P}$ -matrices were very similar, as indicated by a strong  
305 correlation between predicted selection responses to a set of random selection gradients ( $R^2 =$   
306  $0.97$ ; Fig. 4A), but the relationship differs from a one-to-one slope ( $\beta = 1.42 \pm 0.009$ ). This  
307 reflects that the ancestral  $\mathbf{P}$  possessed more variance among leading eigenvectors (Fig. 3A).

308

### 309 **The effect of ancestral evolvability on divergence**

310 To test if populations have diverged more in direction of greater ancestral evolvability, and  
311 thus how well  $\mathbf{P}$  predicts divergence, we regressed evolutionary divergence between  
312 populations on variation as given by the diagonal of  $\mathbf{P}$ . Size and melanisation traits line up  
313 almost perfectly ( $\beta = 1.26 \pm 0.41$ ,  $R^2 = 0.97$ ), while the relationship was somewhat less tight  
314 for wing-shape traits ( $\beta = 2.08 \pm 0.67$ ,  $R^2 = 0.54$ ; Fig. 4B).

315 We also asked if populations had diverged in directions of greater-than-average  
316 evolvability. This was the case for all populations (mean female population difference from  
317 overall mean with SE:  $16.7\% \pm 0.8\%$  for the ancestral host race and  $28.2\% \pm 1.1\%$  for the

318 novel host race), and we also detected a tendency for populations diverging in directions of  
319 greater evolvability to have diverged slightly more (Fig. 5).

320

### 321 **The effect of ovipositor on evolvability**

322 Evolvability moderately reduced when conditioned only on ovipositor length, a trait we  
323 expect to have been or be under directional selection in the derived host race (Diegisser et al.  
324 2007; Fig. 5). When comparing autonomy of ovipositor when conditioned on all traits, we  
325 found it to constrain evolution less than any other given trait (Fig. 6). Ovipositor length is  
326 thus less integrated with other traits investigated, compared to how integrated the rest of traits  
327 are with each other. Consistent with this, we found only moderate difference between overall  
328 autonomy conditioned on ovipositor and overall autonomy when excluding the ovipositor. In  
329 the ancestral females, the autonomy of a random trait conditioned on ovipositor were 74.6%  
330 of the mean autonomy, whereas it was 68.8% for the derived host race (Fig. 5).

331

### 332 **Discussion**

333 We addressed to which extent a recent host shift, exerting directional selection on the  
334 ovipositor, had altered P-matrices in *T. conura*. We found reduced evolvability of females of  
335 the derived host race compared to the ancestral host race. This result is consistent with  
336 findings of reduced overall variation in mice that had been under artificial selection (Penna et  
337 al. 2017). One explanation for such a reduction is past or current directional selection acting  
338 on several traits following the host shift (Diegisser et al. 2006a; Diegisser et al. 2006b, 2007;  
339 Diegisser et al. 2008; Nilsson et al. 2022). Interestingly, the reduction in evolvability in the  
340 derived host race is less pronounced in males. This difference could suggest historically  
341 stronger selection on females, but this seems unlikely because there is no indication that  
342 evolvabilities of female traits are lower than those of males (Fig. 3). An alternative, and a

343 more plausible explanation, is that the reduction reflects the inclusion of the ovipositor in the  
344 analyses of female evolvability, suggesting that ovipositor contributes to the host race  
345 differences in evolvability. The difference of female host race evolvability when excluding  
346 ovipositor length to the full set of traits is an 8.3% reduction in the ancestral host race and an  
347 12.9% reduction in the novel host race (Table S3).

348         There is compelling evidence that the ovipositor is under strong selection. The length  
349 of the ovipositor is functionally important and a mismatch between ovipositor length and bud  
350 size results in reduced female reproductive success (Romstock-Volkl 1997). Therefore, the  
351 difference in ovipositor length between the host races (Diegisser et al. 2007; Nilsson et al.  
352 2022) likely reflects adaptation to the derived host race. Historical directional selection may  
353 have caused the observed reduction in standing variation in females of *T. conura*, yet it is  
354 unclear whether there is current directional selection on the length of the ovipositor. If the  
355 population mean phenotype is already close to the new optimum associated with the new host  
356 plant, the ovipositor may currently be under stabilizing selection. Under this scenario, the  
357 reduction in variation may result from a combination of the influence of past directional and  
358 current stabilizing selection on the ovipositor, and possibly correlated responses to stabilizing  
359 selection on other morphological traits.

360         The influence on the ovipositor of indirect response to selection would be reduced,  
361 however, if the ovipositor is modularly independent from variation in other characters  
362 (Wagner et al. 2007; Armbruster et al. 2014). Using the concepts of conditional evolvability  
363 and autonomy, we demonstrated that this is at least partly true, because the covariance  
364 between ovipositor length and other traits reduced available variation less than did covariance  
365 among other traits (Fig. 6). This may suggest that the ovipositor constitutes a quasi-  
366 independent module separate from the other study traits. The formation of this module is not  
367 a result of the novel selective regime associated with the host shift, however, as patterns of

368 phenotypic covariation are similar in both host races. Therefore, the existing genetic  
369 architecture may have facilitated the rapid host shift observed in *T. conura* (Diegisser et al.  
370 2006b) by allowing divergence in ovipositor length without disrupting other traits.

371         One possible explanation for the reduced variation in the derived host race is that a  
372 stringent bottleneck event occurred at the host transition phase, as suggested by the lower  
373 variation in mitochondrial haplotypes in the derived host race (Diegisser et al. 2006b). This  
374 would substantially reduce the variation available within the ancestral gene pool (Nei et al.  
375 1975), and potentially evolvability. Moreover, the host races overlap in phenology by 16%  
376 (Romstock-Volkl 1997), and larval survival on the alternative host plant is 10% (Diegisser et  
377 al. 2008). Thus only 1.6% of individuals are expected to survive on the alternative host plant,  
378 given a uniform phenotypic distribution and random mating among host races. The host shift  
379 has reduced the size of **P** in the derived host race, especially for females, while our analyses  
380 suggest limited changes in the shape of **P** (Fig. 3 A-B). Our findings add to the evidence that  
381 **P** (or **G**) may change following divergence (Eroukhmanoff and Svensson 2011; Björklund et  
382 al. 2013), although the changes in **P** we find are moderate and sex-dependent. Our findings  
383 may be inherent to the traits we decided to measure, or an effect of using **P** as a proxy for **G**.  
384 Our use of **P** as a proxy for **G** is justified based on previous case studies (Kohn and Atchley  
385 1988; Roff and Mousseau 2005; Porto et al. 2009), empirical assessment (Sodini et al. 2018)  
386 and theoretical work (Cheverud 1988). The *Tephritidae* family is relatively closely related to  
387 *Drosophilidae*, a family where **P** has been found to approximate **G** (but see McGuigan and  
388 Blows 2007).

389         Our chosen size and melanisation traits had orders of magnitude higher evolvability  
390 than wing shape traits. Low variance in the shape compared to size and melanisation traits in  
391 *T. conura* is consistent with other studies reporting shape to be less evolvable than size (Hunt  
392 2007; Houle et al. 2017). At a glance, this result contrasts with our previous finding that wing



393 shapes differ between *T. conura* host races (Nilsson et al. 2022). Evolvability is a measure of  
394 expected response to selection in percent of the trait mean following an episode of unit  
395 strength selection (Houle 1992). Despite a comparatively low evolvability of in wing shape,  
396 that is approximately 0.006% of centroid size (Fig. 3F), the half-time, i.e. the number of  
397 generations needed to double or halve the trait measurement, could be rather quick in an  
398 evolutionary time scale. Given an assumed standard heritability of 0.27 (estimate of shape  
399 traits from Hansen and Pelabon (2021)) the half-time would be roughly 43 thousand  
400 generations under persistent directional selection. Given the divergence time between the  
401 derived and ancestral host specialists estimated to have coincided with the glacial retraction  
402 following the most recent ice age (Diegisser et al. 2006a) and the univoltine nature of *T.*  
403 *conura*, our estimates of evolvability could result in appreciable variation in wing shape.  
404 Therefore, the lower evolvability of wing shape compared to size traits should not be taken as  
405 evidence of low evolvability at evolutionary time scales.

406         One reason for low evolvability in wing shape of *T. conura* is that these traits are  
407 tightly integrated and related to overall wing size. The Procrustes fit we applied to the wings  
408 standardize the size and alignment of all images was aimed to compare shape while  
409 correcting for size. If we instead perform a Procrustes fit without scaling wing shape to  
410 centroid size, 97% of total variance is explained by the first principal component,  
411 representing wing size. Almost all of the variation in wing shapes are strongly correlated to  
412 size variation (Fig. S3), which we removed by correcting to centroid size. This suggests that  
413 the variation in wing morphology of *T. conura* is largely a matter of scaling up and down of  
414 the exact same wing shape. Such isometric scaling is in contrast with wing shape in another  
415 Dipteran family *Drosophilidae*, which shows considerable shape variation that are unrelated  
416 to size (Bolstad et al. 2015). In the future, it would be interesting to investigate if wing shape  
417 is isometrically related to size in other *Tephritidae* flies.

418           An additional factor that could affect evolvability is gene flow among the host races,  
419 as gene flow could increase the available genetic variation, and thereby increase evolvability  
420 in sympatry (Blows and Higgie 2003; Dochtermann and Matocq 2016; Gompert et al. 2017).  
421 Contrary to this prediction, allopatric and sympatric populations had similar levels of  
422 evolvability. Thus, there is no indication that gene flow affects evolvability in *T. conura*, but  
423 we would need formal tests of introgression in sympatric populations to ascertain the validity  
424 of this conclusion. One interpretation of this result is that novel genetic variants introduced  
425 by gene flow does not necessarily have phenotypic consequences. This may be the case  
426 particularly because the size and shape traits in our study most likely have highly polygenic  
427 genetic architecture (Noble et al. 2017). Alternatively, the lack of effects on the evolvability  
428 of *T. conura* could be explained by the age of secondary sympatry, as evolvability is  
429 predicted to increase following early gene flow due to linkage disequilibrium, but may be  
430 reduced to normal levels after a time of recombination (Tufto 2000). Alternatively, genetic  
431 drift may play a role in the lack of differences between sympatric and allopatric populations,  
432 as several of the sympatric populations were sampled from the edges of the distributions of  
433 the *T. conura* host races. There, effective population sizes may be smaller than in range  
434 center populations. Genetic drift affects the phenotype (**P**) but in stochastic ways (Roff and  
435 Mousseau 2005), and a comparison of **P** and neutral sites would need to be performed to  
436 assess the effects of drift on *T. conura* evolvability.

437           There is a possibility that phenotypic plasticity could contribute to our findings.  
438 Although the flies were hatched in a standardized environment, host plant and sampling  
439 specific effects could nevertheless be expected. There are, however, at least two sympatric  
440 and two allopatric populations of each host race sampled, implying that each type of  
441 population experienced at least two different environments. Furthermore, the strong

442 correlation between **P** and divergence between the host races (Fig. 4B and 5) does, however,  
443 suggest that **P** is an encouragingly reasonable approximation of **G** in *T. conura*.

444

## 445 **Conclusions**

446 We find evidence for reduced current evolvability in response to past or current directional  
447 selection resulting from the colonization of a new niche in females, but not males, of *T.*

448 *conura*. Potentially, the differences between sexes could suggest that selection on the

449 ecologically important ovipositor is responsible for the observed reduction in evolvability.

450 Our study adds to growing evidence that evolvability is predictive of divergence between

451 populations (Bolstad et al. 2014; Houle et al. 2017; McGlothlin et al. 2018; Opedal et al.

452 2023), and illustrates that evolvability is a dynamic entity that evolves when populations are

453 exposed to novel environments.

454

455 **References**

- 456 Armbruster, W. S., C. Pélabon, G. H. Bolstad, and T. F. Hansen. 2014. Integrated  
457 phenotypes: understanding trait covariation in plants and animals. *Philosophical*  
458 *Transactions of the Royal Society B: Biological Sciences* 369:20130245.
- 459 Arnold, S. J., R. Bürger, P. A. Hohenlohe, B. C. Ajie, and A. G. Jones. 2008. Understanding  
460 the evolution and stability of the G-matrix. *Evolution* 62:2451-2461.
- 461 Arnold, S. J., M. E. Pfrender, and A. G. Jones. 2001. The adaptive landscape as a conceptual  
462 bridge between micro- and macroevolution. *Genetica* 112:9-32.
- 463 Assis, A. P. A., J. L. Patton, A. Hubbe, and G. Marroig. 2016. Directional selection effects on  
464 patterns of phenotypic (co)variation in wild populations. *Proc. R. Soc. B-Biol. Sci.*  
465 283:20161615.
- 466 Berner, D., W. E. Stutz, and D. I. Bolnick. 2010. Foraging trait (co)variances in stickleback  
467 evolve deterministically and do not predict trajectories of adaptive diversification.  
468 *Evolution* 64:2265-2277.
- 469 Björklund, M., A. Husby, and L. Gustafsson. 2013. Rapid and unpredictable changes of the  
470 G-matrix in a natural bird population over 25 years. *J. Evol. Biol.* 26:1-13.
- 471 Blows, M. and M. Higgie. 2003. Genetic constraints on the evolution of mate recognition  
472 under natural selection. *Am. Nat.* 161:240-253.
- 473 Bolstad, G. H., J. A. Cassara, E. Márquez, T. F. Hansen, K. van der Linde, D. Houle, and C.  
474 Pélabon. 2015. Complex constraints on allometry revealed by artificial selection on  
475 the wing of *Drosophila melanogaster*. *Proc. Natl. Acad. Sci.* 112:13284-13289.
- 476 Bolstad, G. H., T. F. Hansen, C. Pelabon, M. Falahati-Anbaran, R. Perez-Barrales, and W. S.  
477 Armbruster. 2014. Genetic constraints predict evolutionary divergence in  
478 *Dalechampia* blossoms. *Philos. Trans. R. Soc. B-Biol. Sci.* 369.

- 479 Bradshaw, A. D. and T. McNeilly. 1991. Evolutionary response to global climatic change.  
480 Ann. Bot. 67:5-14.
- 481 Cano, J. M., A. Laurila, J. Palo, and J. Merilä. 2004. Population differentiation in G matrix  
482 structure due to natural selection in *Rana temporaria*. Evolution 58:2013-2020.
- 483 Cheverud, J. M. 1988. A comparison of genetic and phenotypic correlations. Evolution  
484 42:958-968.
- 485 Diegisser, T., J. Johannesen, and A. Seitz. 2006a. The role of geographic setting on the  
486 diversification process among *Tephritis conura* (*Tephritidae*) host races. Heredity  
487 96:410-418.
- 488 Diegisser, T., J. Johannesen, and A. Seitz. 2008. Performance of host-races of the fruit fly,  
489 *Tephritis conura* on a derived host plant, the cabbage thistle *Cirsium oleraceum*:  
490 Implications for the original host shift. J. Insect Sci. 8:1-6.
- 491 Diegisser, T., A. Seitz, and J. Johannesen. 2006b. Phylogeographic patterns of host-race  
492 evolution in *Tephritis conura* (*Diptera: Tephritidae*). Mol. Ecol. 15:681-694.
- 493 Diegisser, T., A. Seitz, and J. Johannesen. 2007. Morphological adaptation in host races of  
494 *Tephritis conura*. Entomol. Exp. Appl. 122:155-164.
- 495 Dochtermann, N. A. and M. D. Matocq. 2016. Speciation along a shared evolutionary  
496 trajectory. Curr. Zool. 62:507-511.
- 497 Doroszuk, A., M. W. Wojewodzic, G. Gort, and J. E. Kammenga. 2008. Rapid divergence of  
498 genetic variance-covariance matrix within a natural population. Am. Nat. 171:291-  
499 304.
- 500 Eroukhmanoff, F. and E. I. Svensson. 2011. Evolution and stability of the G-matrix during  
501 the colonization of a novel environment. J. Evol. Biol. 24:1363-1373.
- 502 Gompert, Z., E. G. Mandeville, and C. A. Buerkle. 2017. Analysis of population genomic  
503 data from hybrid zones. Annu. Rev. Ecol. Evol. Syst. 48:207-229.

- 504 Grabowski, M. W., J. D. Polk, and C. C. Roseman. 2011. Divergent patterns of integration  
505 and reduced constraint in the human hip and the origins of bipedalism. *Evolution*  
506 65:1336-1356.
- 507 Guillaume, F. and M. C. Whitlock. 2007. Effects of migration on the genetic covariance  
508 matrix. *Evolution* 61:2398-2409.
- 509 Haber, A. 2016. Phenotypic covariation and morphological diversification in the ruminant  
510 skull. *Am. Nat.* 187:576-591.
- 511 Hadfield, J. D. 2010. MCMC methods for multi-response generalized linear mixed models:  
512 The MCMCglmm R package. *J. Stat. Softw.* 33:1–22.
- 513 Hadfield, J. D., A. Nutall, D. Osorio, and I. P. F. Owens. 2007. Testing the phenotypic  
514 gambit: phenotypic, genetic and environmental correlations of colour. *J. Evol. Biol.*  
515 20:549-557.
- 516 Hammer, Ø., D. A. T. Harper, and P. D. Ryan. 2001. PAST: Paleontological statistics  
517 software package for education and data analysis. *Palaeontol. Electron.* 4:9.
- 518 Hansen, T. F., W. S. Armbruster, M. L. Carlson, and C. Pelabon. 2003. Evolvability and  
519 genetic constraint in *Dalechampia* blossoms: Genetic correlations and conditional  
520 evolvability. *J. Exp. Zool. Part B* 296B:23-39.
- 521 Hansen, T. F. and D. Houle. 2008. Measuring and comparing evolvability and constraint in  
522 multivariate characters. *J. Evol. Biol.* 21:1201-1219.
- 523 Hansen, T. F. and C. Pelabon. 2021. Evolvability: A quantitative-genetics perspective. Pp.  
524 153-175 in D. J. Futuyma, ed. *Annu. Rev. Ecol. Evol. Syst.*
- 525 Hansen, T. F. and K. L. Voje. 2011. Deviation from the line of least resistance does not  
526 exclude genetic constraints: a comment on Berner et al. (2010). *Evolution* 65:1821-  
527 1822.

- 528 Houle, D. 1992. Comparing evolvability and variability of quantitative traits. *Genetics*  
529 130:195-204.
- 530 Houle, D., G. H. Bolstad, K. van der Linde, and T. F. Hansen. 2017. Mutation predicts 40  
531 million years of fly wing evolution. *Nature* 548:447-450.
- 532 Hunt, G. 2007. The relative importance of directional change, random walks, and stasis in the  
533 evolution of fossil lineages. *Proc. Natl. Acad. Sci.* 104:18404-18408.
- 534 Jones, A. G., S. J. Arnold, and R. Bürger. 2003. Stability of the G-matrix in a population  
535 experiencing pleiotropic mutation, stabilizing selection, and genetic drift. *Evolution*  
536 57:1747-1760.
- 537 Klingenberg, C. P. and S. D. Zaklan. 2000. Morphological integration between  
538 developmental compartments in the *Drosophila* wing. *Evolution* 54:1273-1285.
- 539 Kohn, L. P. and W. R. Atchley. 1988. How similar are genetic correlations structures? Data  
540 from mice and rats. *Evolution* 42:467-481.
- 541 Lande, R. 1979. Quantitative Genetic Analysis of Multivariate Evolution, Applied to Brain:  
542 Body Size Allometry. *Evolution* 33:402-416.
- 543 Matlab. 2017. 9.3.0.713579 (R2017b). The MathWorks Inc., Natick, Massachusetts.
- 544 McGlothlin, J. W., M. E. Kobiela, H. V. Wright, D. L. Mahler, J. J. Kolbe, J. B. Losos, and  
545 E. D. Brodie III. 2018. Adaptive radiation along a deeply conserved genetic line of  
546 least resistance in *Anolis* lizards. *Evol. Lett.* 2:310-322.
- 547 McGuigan, K. and M. W. Blows. 2007. The phenotypic and genetic covariance structure of  
548 drosophilid wings. *Evolution* 61:902-911.
- 549 Milocco, L. and I. Salazar-Ciudad. 2022. Evolution of the G matrix under nonlinear  
550 genotype-phenotype maps. *Am. Nat.* 199:420-435.
- 551 Nei, M., T. Maruyama, and R. Chakraborty. 1975. The bottleneck effect and genetic  
552 variability in populations. *Evolution* 29:1-10.

- 553 Nilsson, K. J., J. Ortega, M. Friberg, and A. Runemark. 2022. Non-parallel morphological  
554 divergence following colonization of a new host plant. *Evol. Ecol.* 36:859-877.
- 555 Noble, L. M., I. Chelo, T. Guzella, B. Afonso, D. D. Riccardi, P. Ammerman, A. Dayarian,  
556 S. Carvalho, A. Crist, A. Pino-Querido, B. Shraiman, M. V. Rockman, and H.  
557 Teotónio. 2017. Polygenicity and epistasis underlie fitness-proximal traits in the  
558 *Caenorhabditis elegans* multiparental experimental evolution (CeMEE) panel.  
559 *Genetics* 207:1663-1685.
- 560 Opedal, Ø. H., W. S. Armbruster, T. F. Hansen, A. Holstad, C. Pélabon, S. Andersson, D. R.  
561 Campbell, C. M. Caruso, L. F. Delph, C. G. Eckert, Å. Lankinen, G. M. Walter, J.  
562 Ågren, and G. H. Bolstad. 2023. Evolvability and trait function predict phenotypic  
563 divergence of plant populations. *Proc. Natl. Acad. Sci.* 120:e2203228120.
- 564 Ortega et al., J. [*in prep.*]. Genomic landscape of *Tephritis conura*.
- 565 Paaby, A. B. and M. V. Rockman. 2014. Cryptic genetic variation: Evolution's hidden  
566 substrate. *Nat. Rev. Genet.* 15:247-258.
- 567 Pélabon, C., T. F. Hansen, A. J. R. Carter, and D. Houle. 2010. Evolution of variation and  
568 variability under fluctuating, stabilizing, and disruptive selection. *Evolution* 64:1912-  
569 1925.
- 570 Penna, A., D. Melo, S. Bernardi, M. I. Oyarzabal, and G. Marroig. 2017. The evolution of  
571 phenotypic integration: How directional selection reshapes covariation in mice.  
572 *Evolution* 71:2370-2380.
- 573 Pieterse, W., H. A. Benitez, and P. Addison. 2017. The use of geometric morphometric  
574 analysis to illustrate the shape change induced by different fruit hosts on the wing  
575 shape of *Bactrocera dorsalis* and *Ceratitis capitata* (Diptera: Tephritidae). *Zool.*  
576 *Anz.* 269:110-116.



- 577 Porto, A., F. B. de Oliveira, L. T. Shirai, V. De Conto, and G. Marroig. 2009. The evolution  
578 of modularity in the mammalian skull I: Morphological integration patterns and  
579 magnitudes. *Evol. Biol.* 36:118-135.
- 580 R Core Team. 2019. R: A language and environment for statistical computing. R Foundation  
581 for Statistical Computing, Vienna, Austria. URL <https://www.R-project.org/>.
- 582 Revell, L. J., D. L. Mahler, J. R. Sweeney, M. Sobotka, V. E. Fancher, and J. B. Losos. 2010.  
583 Nonlinear selection and the evolution of variances and covariances for continuous  
584 characters in an anole. *J. Evol. Biol.* 23:407-421.
- 585 Roff, D. A. and T. Mousseau. 2005. The evolution of the phenotypic covariance matrix:  
586 evidence for selection and drift in *Melanoplus*. *J. Evol. Biol.* 18:1104-1114.
- 587 Rohlf, F. J. 2015. The tps series of software. *Hystrix* 26:9-12.
- 588 Romstock-Vokl, M. 1997. Host race formation in *Tephritis conura*: Determinants from three  
589 trophic levels. *Ecol. Stud.* 130:21-38.
- 590 Schluter, D. 1996. Adaptive radiation along genetic lines of least resistance. *Evolution*  
591 50:1766-1774.
- 592 Schluter, D. 2000. The ecology of adaptive radiation. Oxford University Press, Oxford.
- 593 Sivinski, J. and R. Pereira. 2005. Do wing markings in fruit flies (*Diptera: Tephritidae*) have  
594 sexual significance? *Fla. Entomol.* 88:321-324.
- 595 Sodini, S. M., K. E. Kemper, N. R. Wray, and M. Trzaskowski. 2018. Comparison of  
596 genotypic and phenotypic correlations: Cheverud's conjecture in humans. *Genetics*  
597 209:941-948.
- 598 Stepan, S. J., P. C. Phillips, and D. Houle. 2002. Comparative quantitative genetics:  
599 evolution of the G matrix. *Trends Ecol. Evol.* 17:320-327.
- 600 Tsuboi, M., W. van der Bijl, B. T. Kopperud, J. Erritzøe, K. L. Voje, A. Kotrschal, K. E.  
601 Yopak, S. P. Collin, A. N. Iwaniuk, and N. Kolm. 2018. Breakdown of brain–body

602 allometry and the encephalization of birds and mammals. *Nat. Ecol. Evol.* 2:1492-  
603 1500.

604 Tufto, J. 2000. The evolution of plasticity and nonplastic spatial and temporal adaptations in  
605 the presence of imperfect environmental cues. *Am. Nat.* 156:121-130.

606 Wagner, G. P., M. Pavlicev, and J. M. Cheverud. 2007. The road to modularity. *Nat. Rev.*  
607 *Genet.* 8:921-931.

608 Walsh, B. and M. W. Blows. 2009. Abundant genetic variation plus strong selection =  
609 multivariate genetic constraints: A geometric view of adaptation. *Annu. Rev. Ecol.*  
610 *Evol. Syst.* 40:41-59.

611 Walter, G. M., J. D. Aguirre, M. W. Blows, and D. Ortiz-Barrientos. 2018. Evolution of  
612 genetic variance during adaptive radiation. *Am. Nat.* 191:E108-E128.

613 Whitlock, M. C., P. C. Phillips, and K. Fowler. 2002. Persistence of changes in the genetic  
614 covariance matrix after a bottleneck. *Evolution* 56:1968-1975.

615 Willis, J. H., J. A. Coyne, and M. Kirkpatrick. 1991. Can one predict the evolution of  
616 quantitative characters without genetics. *Evolution* 45:441-444.

617

618

619

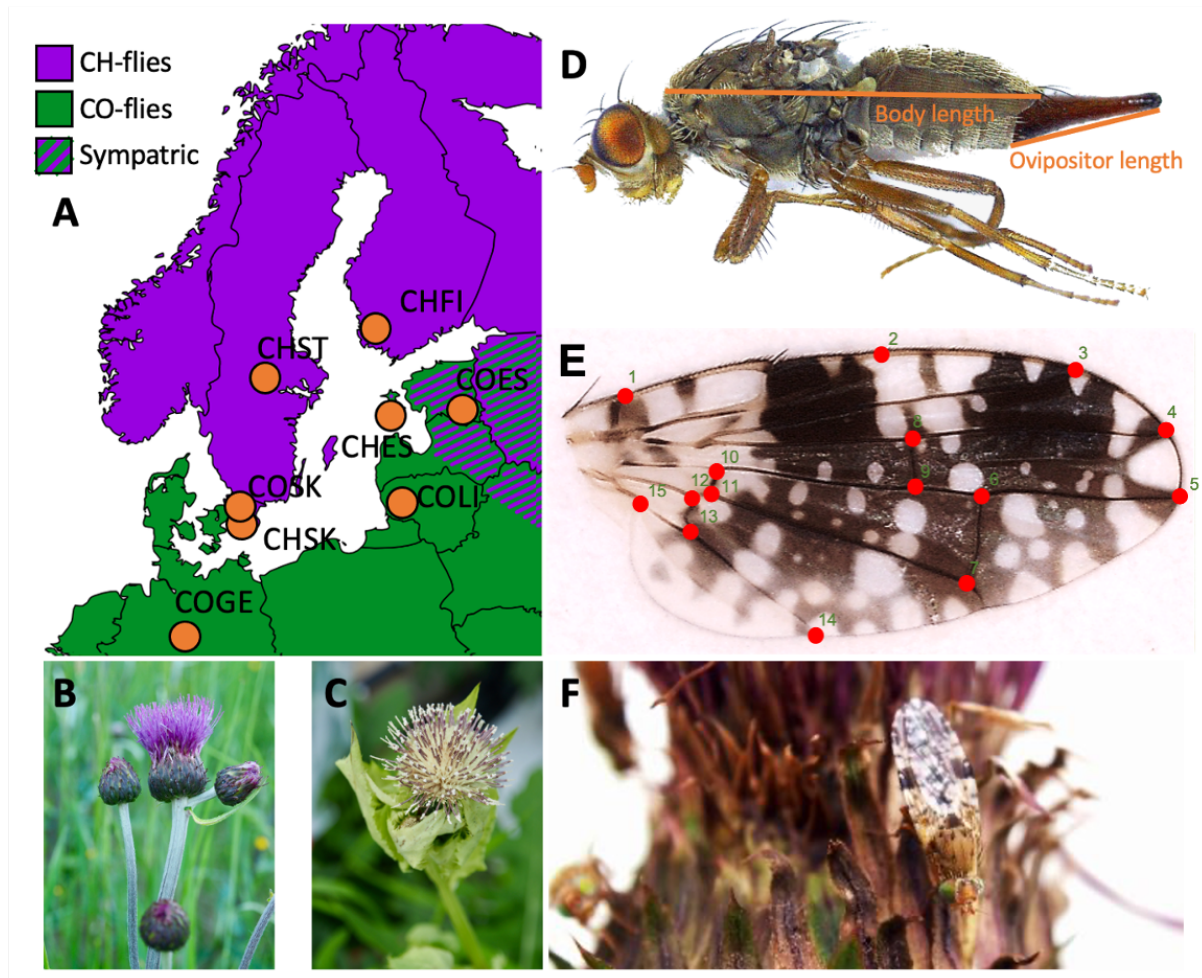

620

621 **Figure 1.** Sampling design, host plants, and traits investigated. **A)** Parallel sampling of  
622 allopatric and sympatric populations of the two host races of *T. conura* flies east and west of  
623 the Baltic. **B)** The ancestral host plant, *C. heterophyllum*. **C)** The derived host plant, *C.*  
624 *oleraceum*. **D)** Morphometric size measurements of *T. conura*. **E)** Landmarks used for wing  
625 shape morphometrics of *T. conura*. **F)** *Tephritis conura* on a *C. heterophyllum* bud.

626

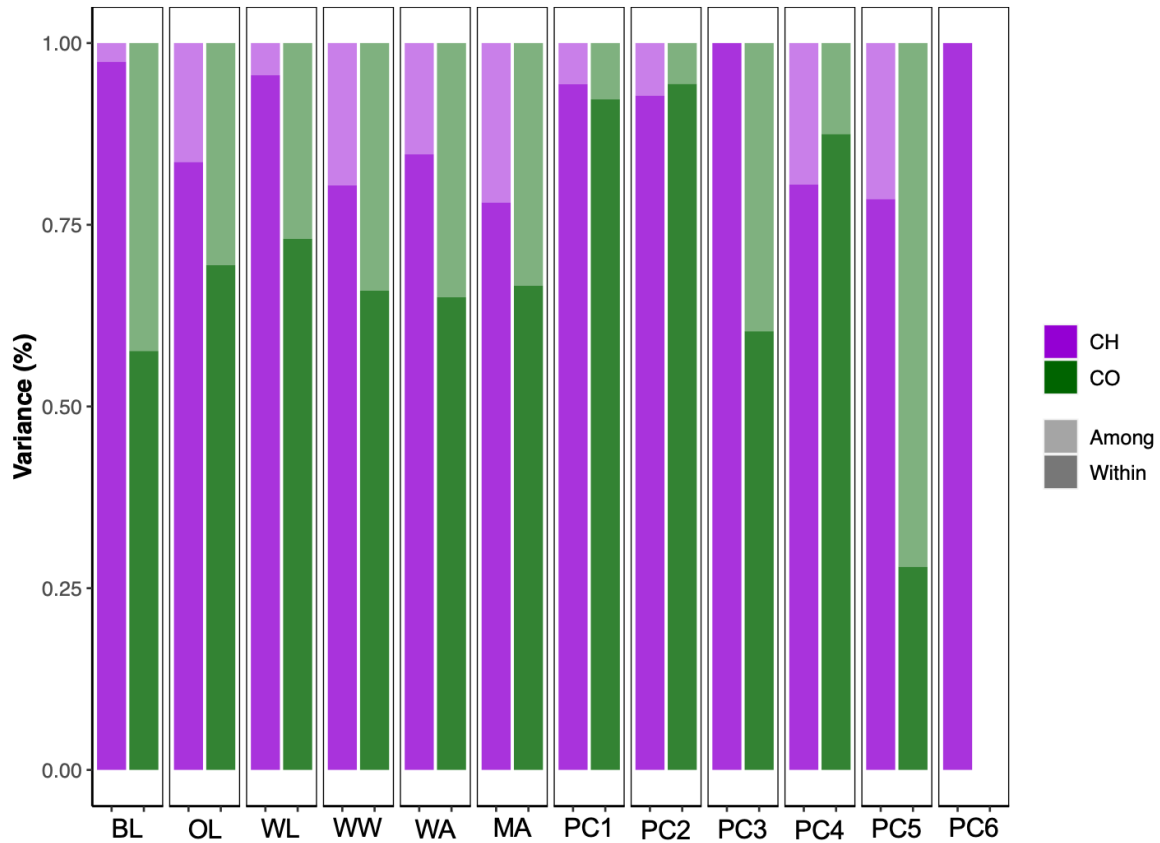

627

628 **Figure 2.** Proportional trait variance among and within populations for each host race given

629 as percent. Note that several of the wing shape traits were insufficiently variable to

630 disentangle among and within population variation, specifically among population variation

631 in PC 3 and PC 6 of the ancestral host race as well as any variation in PC6 of the novel host

632 race. Those traits are represented as zeroes here. Trait abbreviations are MA: melanised area,

633 OL: ovipositor length, BL: body length, WW: wing width, WL: wing length and PC1-6

634 represents the wing shape principal components.

635

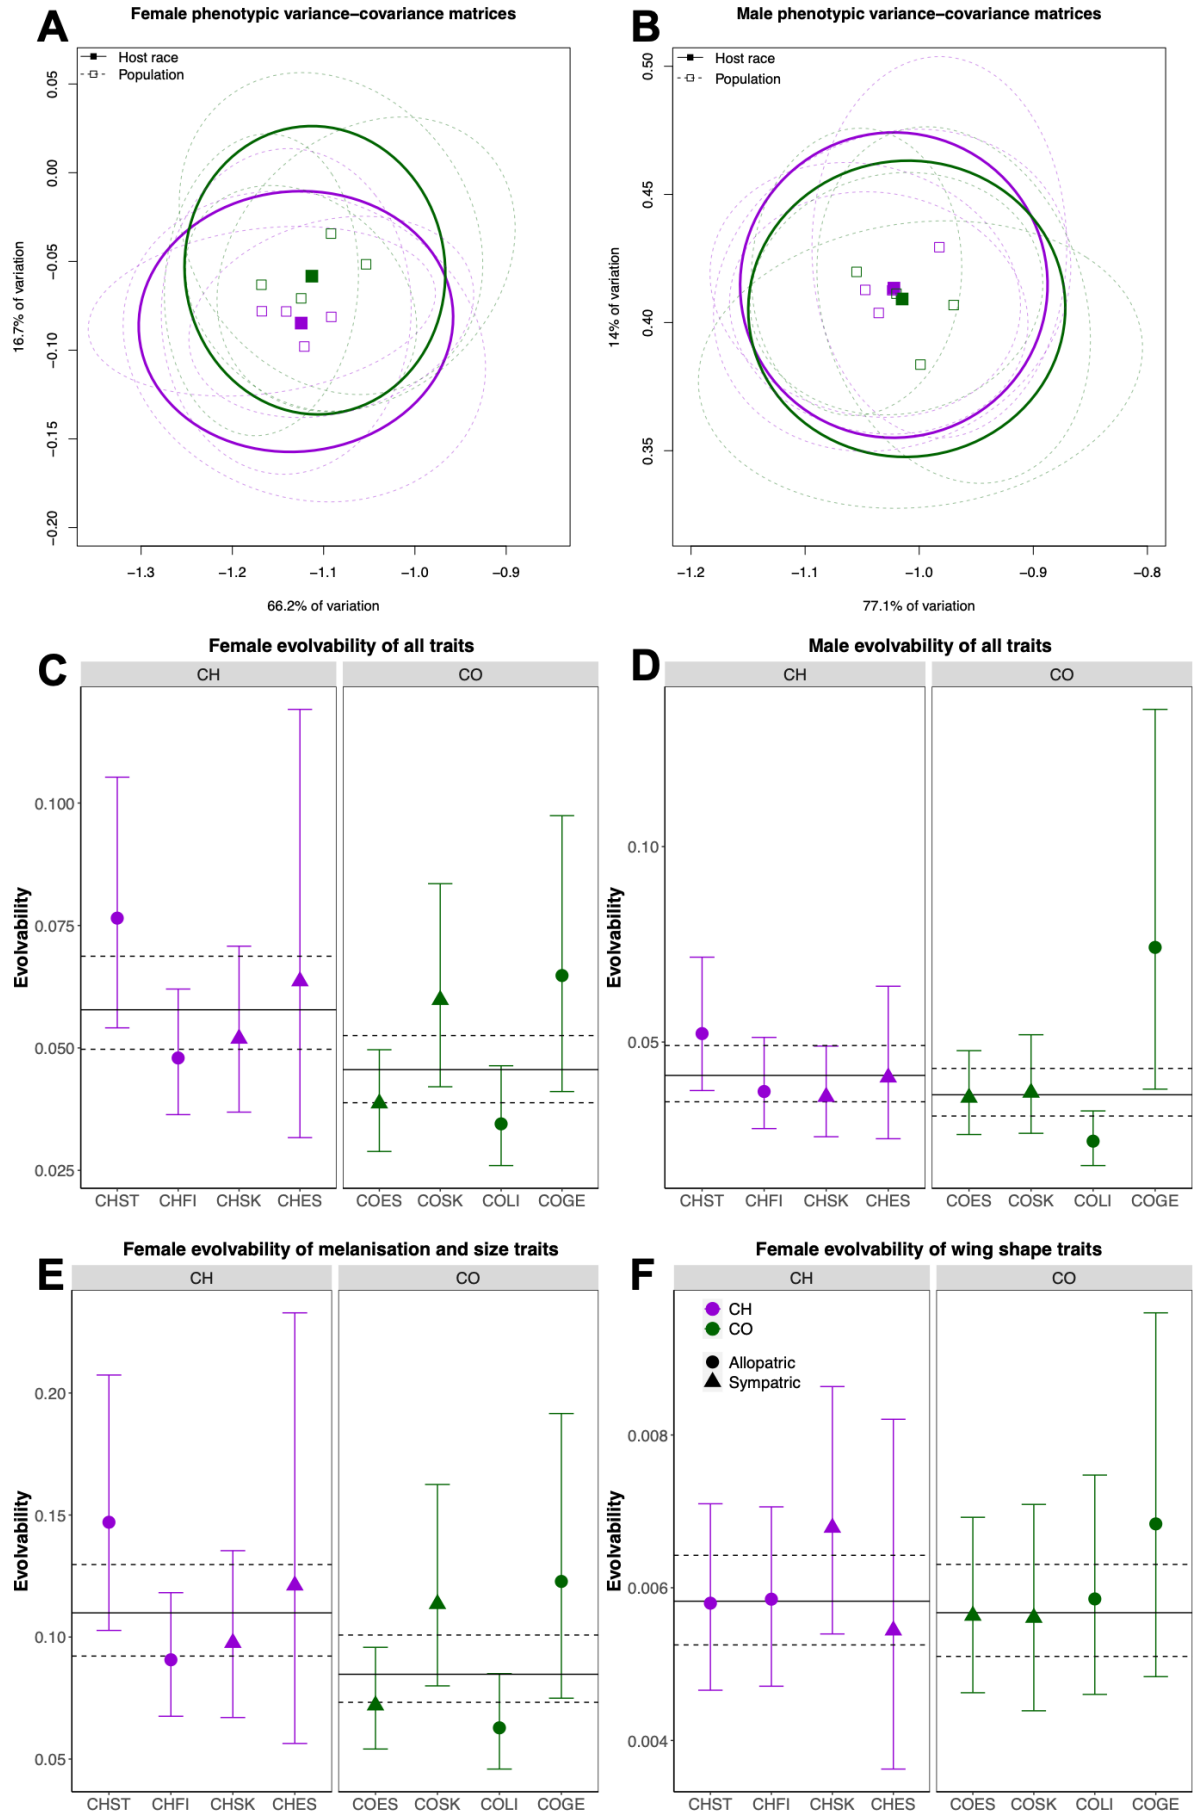

637 **Figure 3.** Comparisons of evolvability among populations and host races. **A)** and **B)** Two-  
638 dimensional representation of phenotypic variation based on principal components analysis  
639 on females (**A**) and males (**B**). Purple represents flies belonging to the *C. heterophyllum* host  
640 race and green represents flies belonging to the *C. oleraceum* host race (see legend Fig. 3E).  
641 Solid squares represent host race units of evolvability, and open squares represent population  
642 units of evolvability. Solid ellipses show 95% confidence interval of the overall host race  
643 measurements whereas the dashed ellipses show 95% confidence interval of the population  
644 measurements. **C** and **D)** Population and host race comparison when including all traits in  
645 females (**C**) and males (**D**). Colors are host race specific, and triangles denote sympatric  
646 populations and circles allopatric populations. Dashed lines represent maximum and  
647 minimum evolvability and solid lines represent mean evolvability as estimated by MCMC  
648 models. **E)** Population and host race comparison when including only size traits and  
649 melanisation in females. **F)** Population and host race comparison when including only female  
650 wing shape traits.  
651

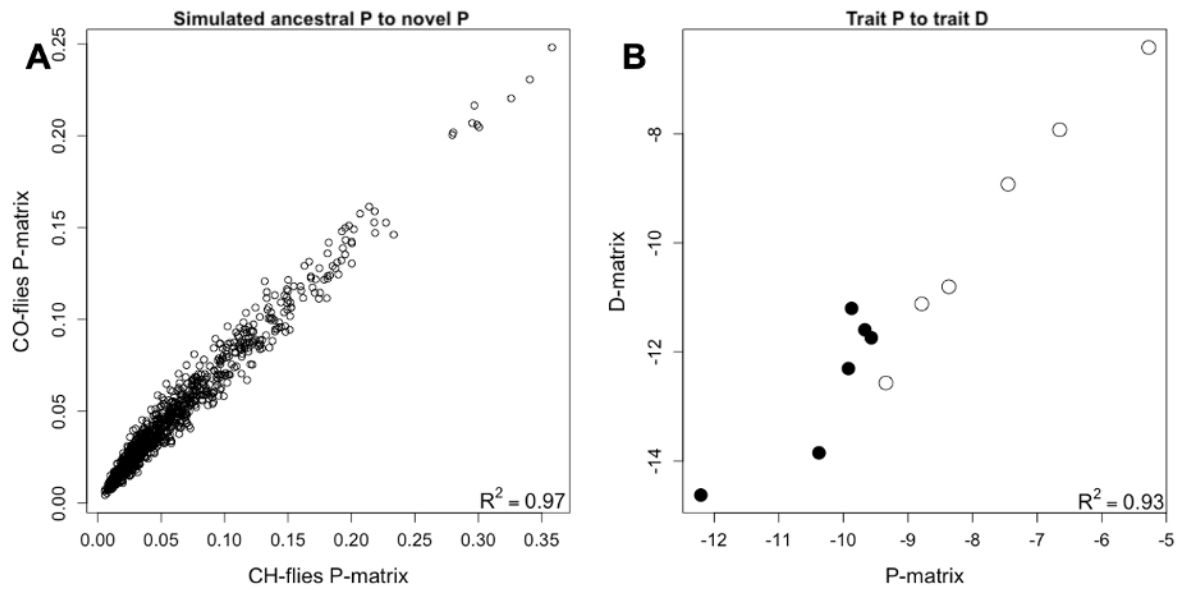

652

653 **Figure 4. A)** Scatterplot of variation along 1000 random selection gradients for the derived  
654 and ancestral host race. **B)** Relationship between within-population variation (P-matrix) and  
655 evolutionary divergence (D-matrix) for all traits. Open circles represent size and melanisation  
656 traits whereas closed circles represent wing shape traits.

657

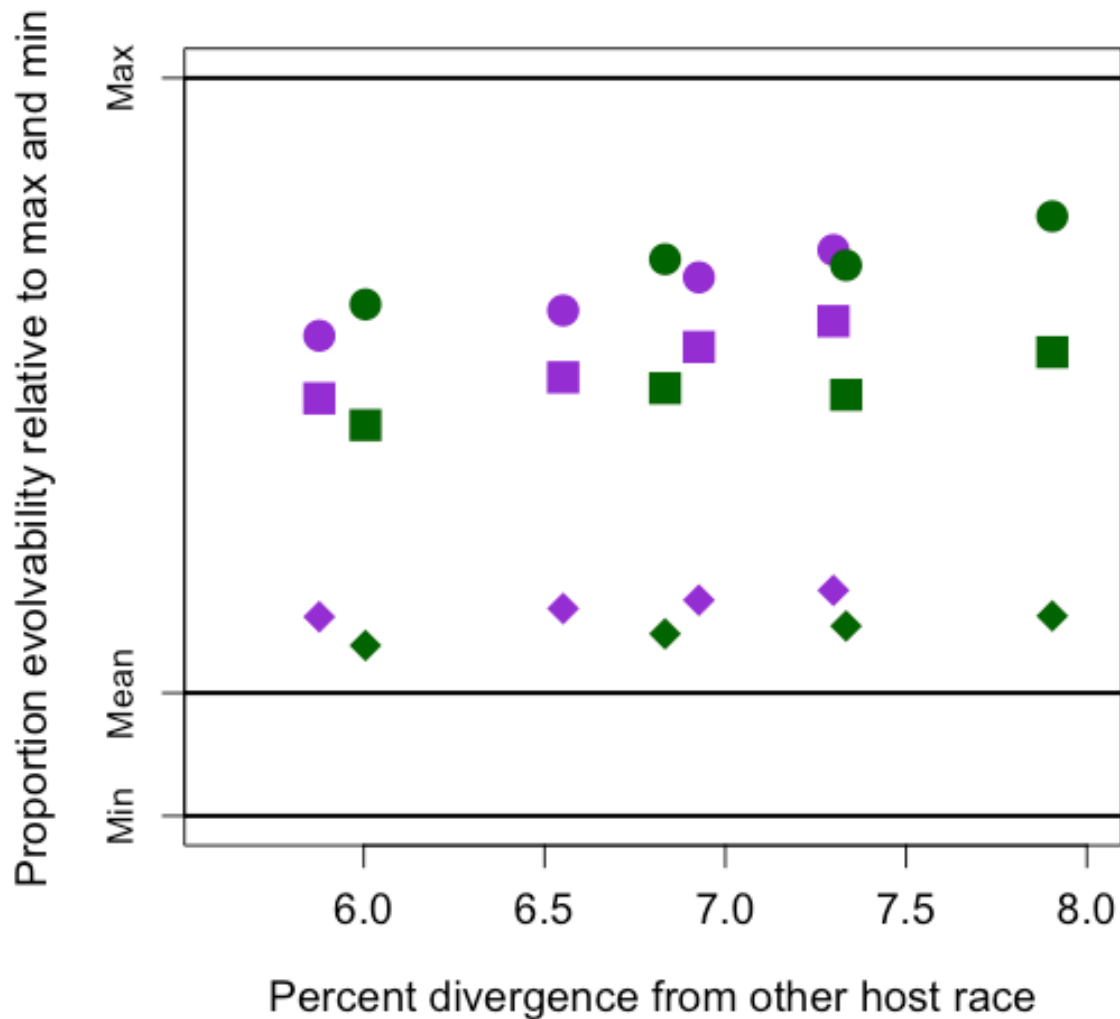

658

659 **Figure 5.** Proportional female evolvability when conditioned on ovipositor length for each  
660 population and estimated divergence from alternative host race. Full black lines represent  
661 maximum, mean and minimum evolvability of all fly females. The divergence for each  
662 population is estimated relative to the mean of all populations of the other host race. Purple  
663 points represent the ancestral host race while green points represent the novel host race.  
664 Circles represent mean evolvability, squares represent evolvability conditioned on ovipositor  
665 length and diamond shapes represent evolvability conditioned on all traits except for  
666 ovipositor length. Populations from left to right are CHES, COLI, CHFI, COES, CHST,  
667 CHSK, COGE and COSK.



668

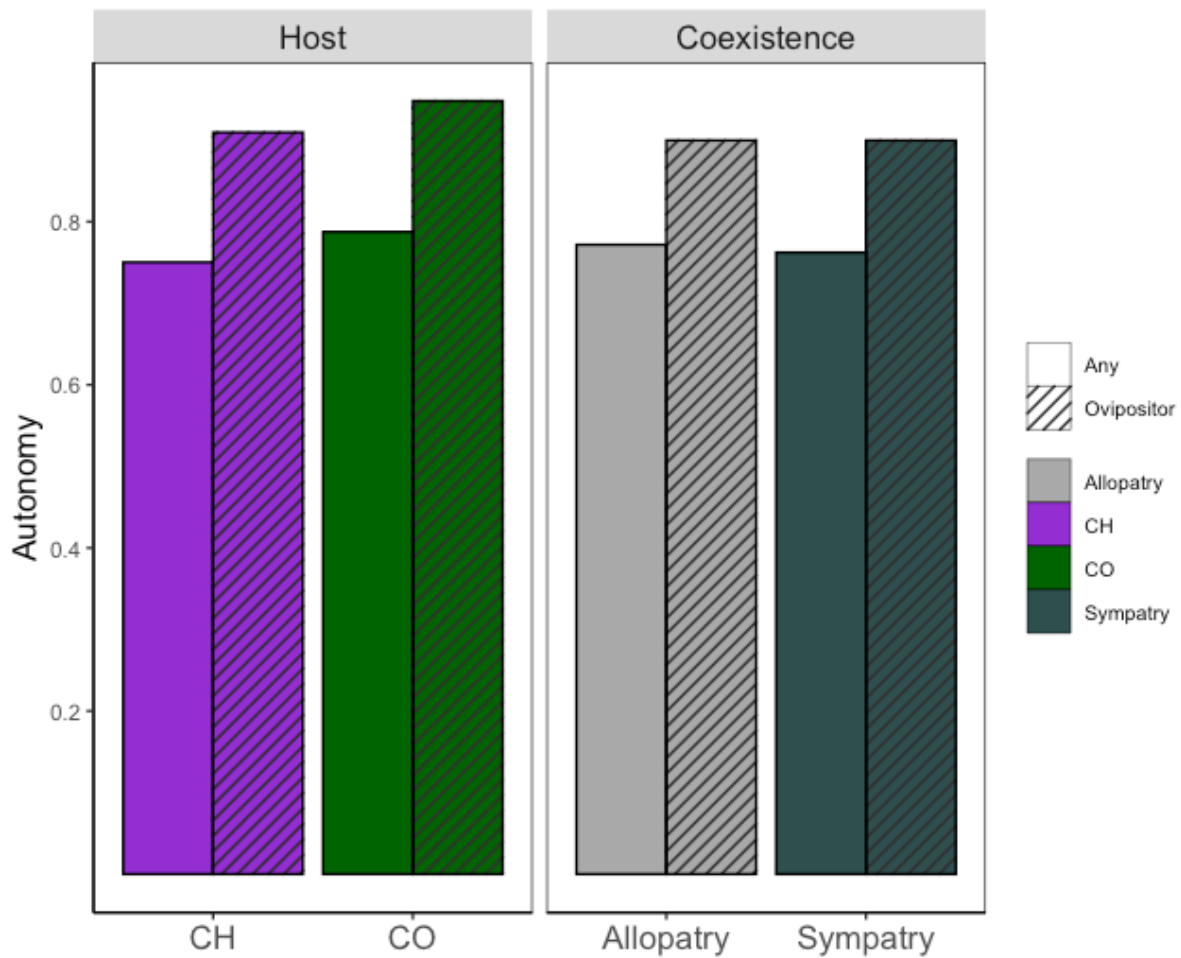

669

670 **Figure 6.** Evolvability when conditioned on ovipositor length for each of the two host races  
671 and in allopatry and sympatry. Autonomy in all traits when conditioned on any given trait or  
672 ovipositor length. Any trait represents the mean autonomy of body size, wing length, wing  
673 width, wing area and melanisation area.
